# Supplementary material for: In Situ Crosslinked Hydrogel Depot for Sustained Antibody Release Improves Immune Checkpoint Blockade Cancer Immunotherapy
Source: PubMed Central journal article supplement (PMC7918828; doi:10.3390/nano11020471), 2021-02-12
Supplement: nanomaterials-11-00471-s001.pdf [file nanomaterials-11-00471-s001.pdf]

## Supplementary Materials

### Hydrogel Depot for Sustained Antibody Release Improves Immune Checkpoint Blockade Cancer Immunotherapy

*Jihoon Kim, David M. Francis and Susan N. Thomas\**

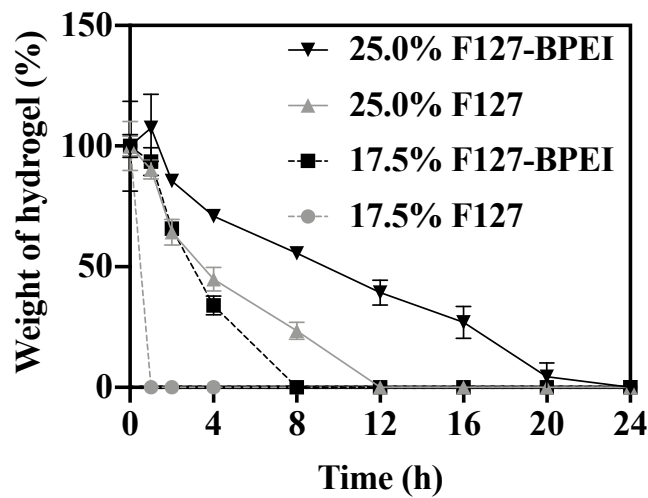

**Supplementary Figure S1.** Stability of F127 and F127-BPEI hydrogel in DMEM containing 10% FBS at 37 °C.

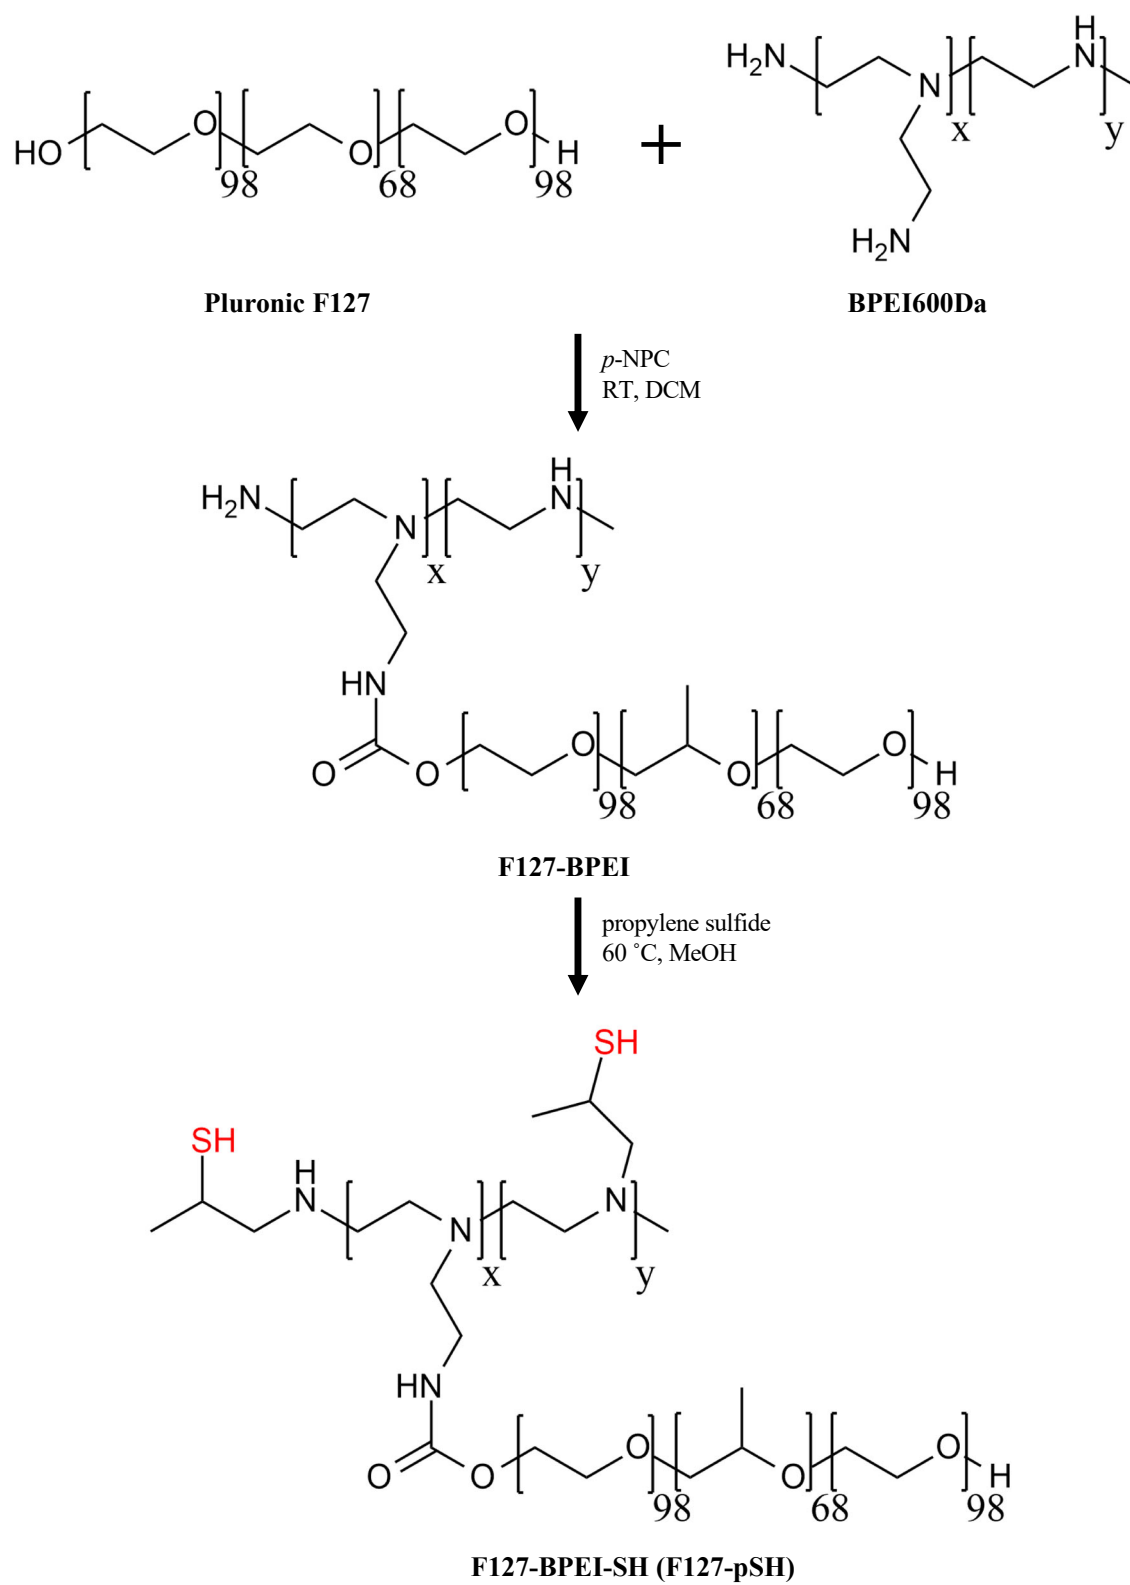

**Supplementary Figure S2.** Schematic of F127-pSH synthesis method.

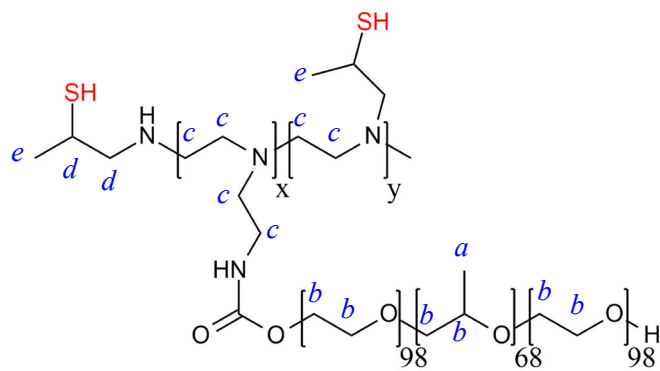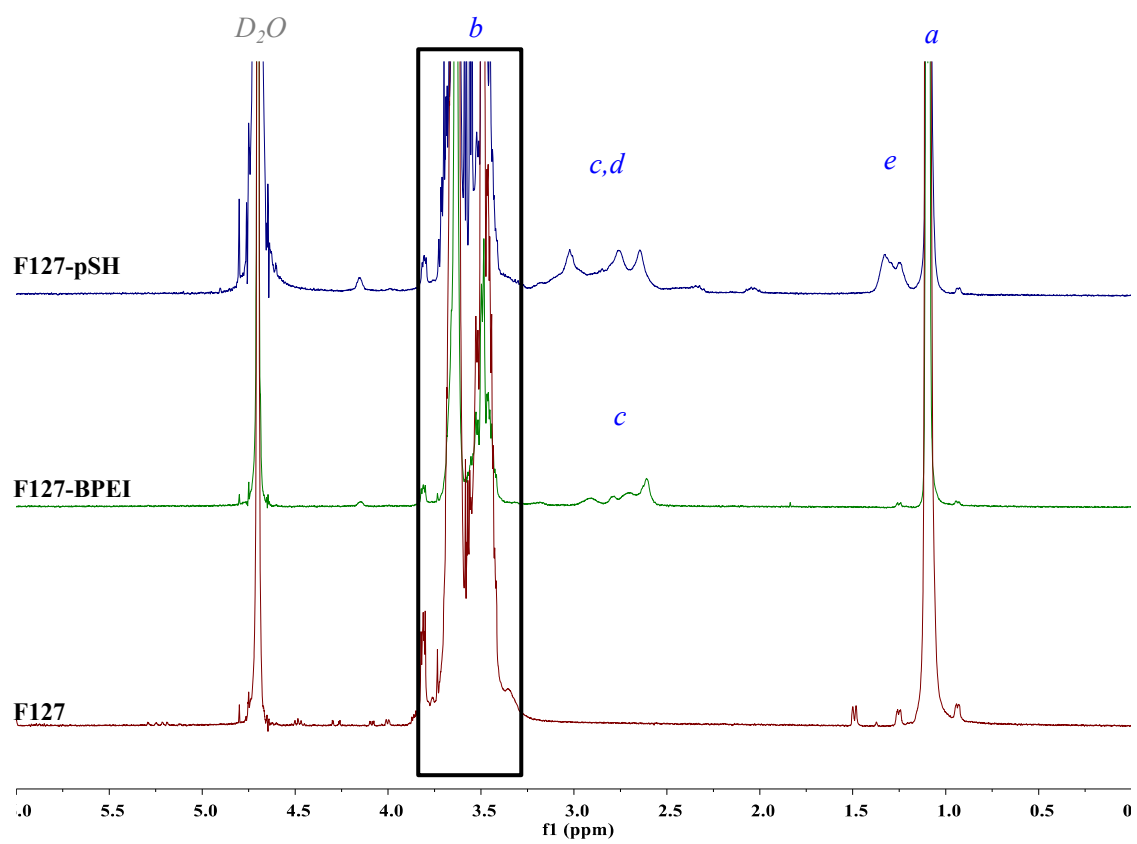

Supplementary Figure S3.  $^1\text{H}$  NMR of F127, F127-BPE, and F127-pSH in  $\text{D}_2\text{O}$ .

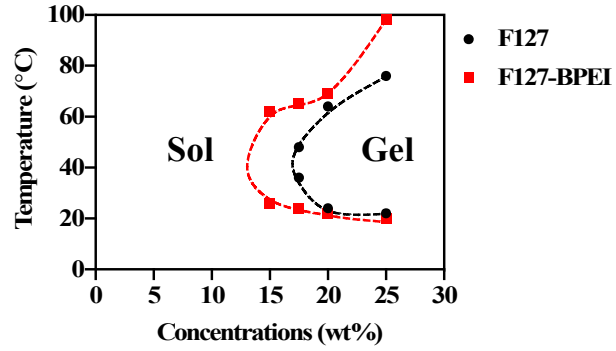

**Supplementary Figure S4.** Temperature- and concentration-dependent sol-gel transition of F127 and F127-BPEI.

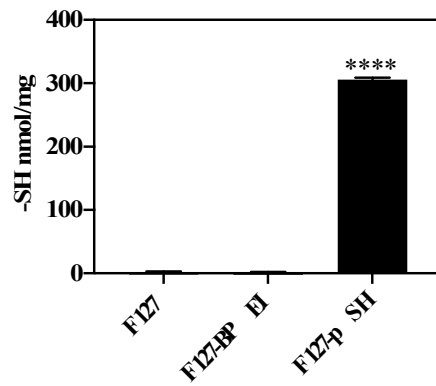

**Supplementary Figure S5.** Quantification of weight density of polymer thiol groups in F127, F127-BPEI, and F127-pSH.

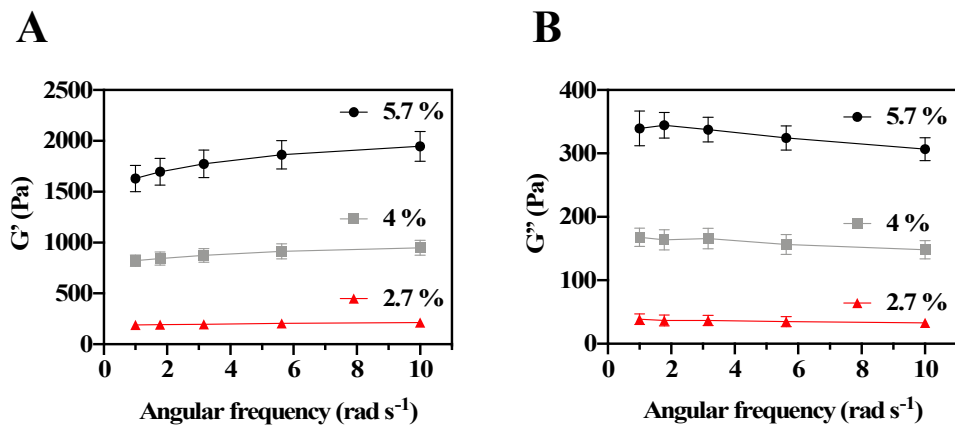

**Supplementary Figure S6.** Modulus of F127/PEG hydrogel at varying angular frequencies. (A) Storage modulus ( $G'$ ) of F127/PEG hydrogel at angular frequency 1-10  $\text{rad s}^{-1}$ . (B) Loss modulus ( $G''$ ) of F127/PEG hydrogel at angular frequencies of 1-10  $\text{rad s}^{-1}$ .

**Supplementary Table S1.** Sol-gel and gel-sol transition temperature of F127 and F127-BPEI.

| %    | Sol→gel transition temperature / Gel→seperation transition temperature |               |
|------|------------------------------------------------------------------------|---------------|
|      | F127                                                                   | F127-BPEI     |
| 1    | Not available (N.A.)                                                   | N.A.          |
| 5    | N.A.                                                                   | N.A.          |
| 10   | N.A.                                                                   | N.A.          |
| 15   | N.A.                                                                   | 26 °C / 62 °C |
| 17.5 | 36 °C / 48 °C                                                          | 24 °C / 65 °C |
| 20   | 24 °C / 64 °C                                                          | 22 °C / 69 °C |
| 25   | 22 °C / 76 °C                                                          | 20 °C / 98 °C |
